# Supplementary material for: Anthraquinone thin-film electrodes for reversible CO2 capture and release
Source: Royal Society of Chemistry journal article supplement (doi:10.1039/c8ta04817g), 2018-01-01
Supplement: c8ta04817g1.pdf [file c8ta04817g1.pdf]

## Supporting Information

### Anthraquinone thin-film electrodes for reversible CO<sub>2</sub> capture and release

Dominik Wielend<sup>a\*</sup>, Dogukan Hazar Apaydin<sup>a</sup> and Niyazi Serdar Sariciftci<sup>a</sup>

<sup>a</sup>Linz Institute for Organic Solar Cells (LIOS), Institute of Physical Chemistry, Johannes Kepler University Linz, Altenbergerstrasse 69, 4040 Linz, Austria.

\*Corresponding author: [dominik.wielend@jku.at](mailto:dominik.wielend@jku.at)

#### FTIR CO<sub>2</sub> calibration

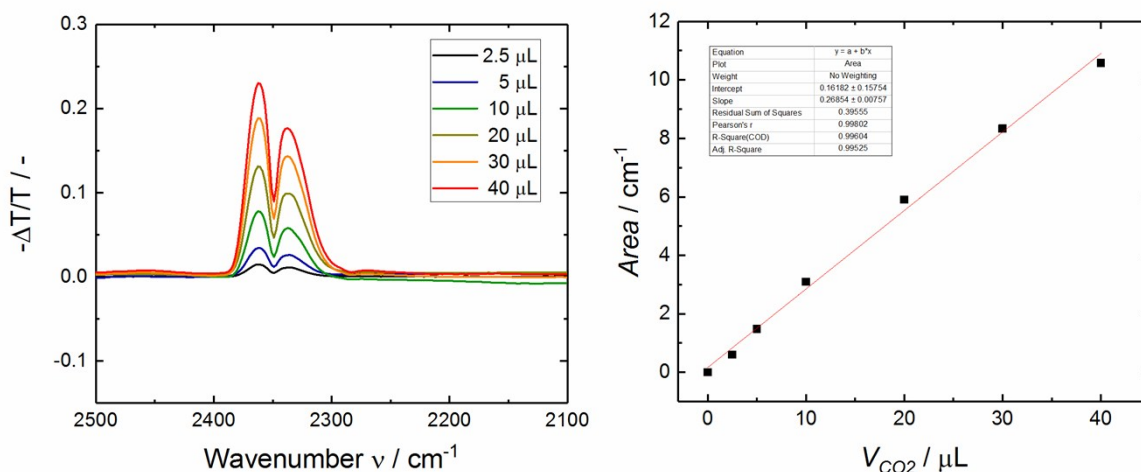

Figure S1: IR spectra of different amounts of CO<sub>2</sub> injected (left image) and the integrated areas versus the corresponding amounts (right image).

The capture release experiment was repeated three times resulting between 1.9 and 2.2 μL of CO<sub>2</sub> released. Taking the actual electrode areas into account an uptake capacity of  $5.9 \pm 0.2 \text{ mmol}_{\text{CO}_2} / \text{g}_{\text{AQ}}$  corresponding to an efficiency (experimental amount of CO<sub>2</sub> / theoretical amount of CO<sub>2</sub>) of 61%.

For those values the detected, released quantity of CO<sub>2</sub> is assumed to be equal to the captured amount.

## ATR-FTIR spectroelectrochemistry

The mentioned *in-situ* spectroelectrochemical investigations were performed under  $N_2$  and  $CO_2$  conditions. In the main text, only the focus on the region below 1800 wavenumbers was shown. For reasons of completeness, here in Figure S2 the full IR spectra at various potentials are shown under  $N_2$  and  $CO_2$  conditions:

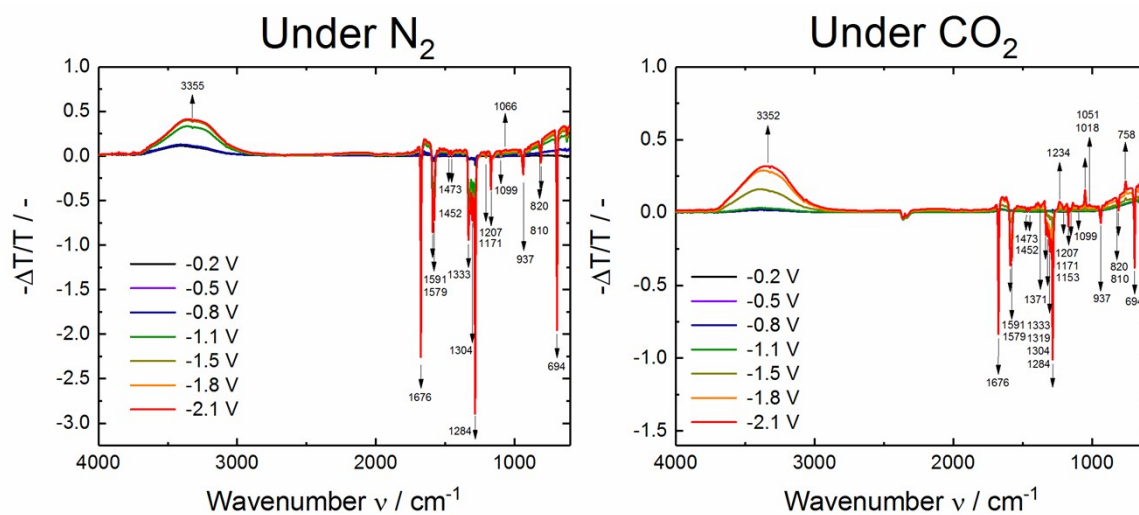

Figure S2: *In-situ* spectroelectrochemistry spectra of AQ/Ge at given potentials. Nitrogen saturated electrolyte solution (left picture) and  $CO_2$  saturated electrolyte solution (right image).
